# Supplementary material for: A pilot study examining the effects of low-volume high-intensity interval training and continuous low to moderate intensity training on quality of life, functional capacity and cardiovascular risk factors in cancer survivors
Source: PeerJ. 2016 Oct 20;4:e2613. doi: 10.7717/peerj.2613 (PMC5075690; doi:10.7717/peerj.2613)
Supplement: Data S1 [file peerj-04-2613-s001.xlsx]

## Sheet: HIT
Code	Group	Age	Predicted VO2peak pre (ml/kg/min)	Predicted VO2 post (ml/kg/min)	% change	Predicted VO2peak Pre L/min	Predicted VO2peak Post L/min	% change	Pre Weight (kg)	Post Weight (kg)	% change	Height (cm)	Pre Hip (cm)	Post Hip (cm)	% change	Pre Waist (cm)	Post Waist (cm)	% change	Pre Resting HR (BPM)	Post resting HR (BPM)	% change	Pre Resting SBP (mmHg)	Post resting SBP	% change	Pre Resting DBP (mmHg)	Post Resting DBP (mmHg)	% change	Pre STS (5) (sec)	Post STS (5) (sec)	% change	Pre 6 min walk (m)	Post 6 min walk (m)	% change	Pre Tissue (%fat)	Post Tissue (%fat)	% change	Pre Centile	Post Centile	% change	Pre Total mass (kg)	Post Total mass (kg)	% change	Pre Region (%fat)	Post Region (%fat)	% change	Pre Tissue (g)	Post Tissue (g)	% change	Pre Fat (g)
KT006	1	56	22.1449	26.6002	20.1189	1.92882	2.1759	12.8097	87.1	81.8	-6.08496	173.2	111	98.5	-11.2613	95	88.5	-6.84211	81	78	-3.7037	132	133	0.757576	79	85	7.59494	14.44	9.44	-34.626	397.5	500	25.7862	40.7	36.9	-9.33661	71	53	-25.3521	86.7	81.8	-5.65167	39.2	35.5	-9.43878	83451	78603	-5.8094	33934
KT009	1	66	31.5578	37.0434	17.3827	1.78933	2.00405	12.0001	56.7	54.1	-4.58554	167	94.73	91	-3.93751	73	69	-5.47945	81	62	-23.4568	141	123	-12.766	80	77	-3.75	12.47	11.45	-8.17963	525	570	8.57143	35.5	33	-7.04225	39	28	-28.2051	55.9	54.1	-3.22004	34	31.7	-6.76471	53512	51826	-3.1507	19021
KT010	1	51	32.1142	25.8062	-19.6424	2.73934	2.17546	-20.5845	85.3	84.3	-1.17233	168	112.5	107	-4.88889	97	92.1	-5.05155	61	98	60.6557	121	119	-1.65289	84	67	-20.2381	11.25	9.63	-14.4	600	622	3.66667	41.8	42.9	2.63158	80	83	3.75	84.1	84.3	0.237812	40.2	41.2	2.48756	80789	80982	0.238894	33764
KT012	1	29	35.1192	34.6674	-1.28648	2.48644	2.37818	-4.35385	70.8	68.6	-3.10734	164	104.5	107.5	2.87081	85	85	0	79	90	13.9241	118	109	-7.62712	71	70	-1.40845	8.12	6.85	-15.6404	525	570	8.57143	42.6	43.6	2.34742	95	96	1.05263	69.6	68.6	-1.43678	40.9	41.8	2.20049	66853	65763	-1.63044	28458
KT015	1	36	22.7474	31.4367	38.1991	2.00405	2.66583	33.0225	88.1	84.8	-3.74574	164	128	118	-7.8125	112	101	-9.82143	105	74	-29.5238	147	134	-8.84354	99	89	-10.101	7.75	5.41	-30.1935	471	547.5	16.242	52.3	51.6	-1.33843	100	99	-1	88.1	84.8	-3.74574	50.6	49.9	-1.3834	85350	82061	-3.85354	44614
KT018	1	62	26.9488	30.8424	14.4481	2.20172	2.50132	13.6076	81.7	81.1	-0.734394	164.5	122	104	-14.7541	110	95	-13.6364	57	56	-1.75439				101	86	-14.8515	13	8.26	-36.4615	390	541	38.7179	52.9	51	-3.59168	97	96	-1.03093	81.7	81.1	-0.734394	51	49.3	-3.33333	78808	78402	-0.515176	41671
KT020	1	42	27.0144	32.4546	20.1381	2.0558	2.47953	20.6118	76.1	76.4	0.394218	167.5	111	111	0	86	85	-1.16279	76	65	-14.4737	128	120	-6.25	85	72	-15.2941	8.82	5.41	-38.6621	319	465	45.768	50.1	48.3	-3.59281	99	97	-2.0202	76.1	76.4	0.394218	48.7	47	-3.49076	73880	74311	0.583378	37040
KT024	1	36	45.646	46.1865	1.18411	2.96699	2.81738	-5.0426	65	61	-6.15385	160.6	100	98	-2	90	80	-11.1111	58	62	6.89655	122	117	-4.09836	77	84	9.09091	6	5.43	-9.5	795	802.5	0.943396	30.4	38.6	26.9737	47	38	-19.1489	64.4	61	-5.2795	29.3	27.5	-6.14334	61943	56648	-8.54818	18859
Ave	1	47.25	30.4116	33.1297	11.3178	2.27156	2.39971	7.75884	76.35	74.0125	-3.14874	166.1	110.466	104.375	-5.22293	93.5	86.95	-6.6381	74.75	73.125	1.0705	129.857	122.143	-5.7829	84.5	78.75	-6.11966	10.2312	7.735	-23.4579	502.812	577.25	18.5334	43.2875	43.2375	0.881361	78.5	73.75	-8.99433	75.825	74.0125	-2.42951	41.7375	40.4875	-3.23328	73073.2	71074.5	-2.83565	32170.1
SD		13.4881	7.64452	6.46953	17.5032	0.417754	0.272385	16.8823	11.3902	11.5506	2.46003	3.74967	10.941	8.45471	5.46522	13.0384	9.77782	4.73681	16.0245	14.8077	28.1819	10.854	8.87747	4.5538	10.5017	8.34523	10.8421	2.97462	2.31401	12.7714	148.526	102.548	16.63	8.07243	6.788	11.3274	24.2251	29.4121	12.9784	11.5777	11.5506	2.38475	7.90008	8.29517	4.22915	11318.2	11628.5	3.1756	9549.49
					14.63			14.11			2.06				4.57			3.73			23.56			4.21			9.06			10.68			13.9			9.47			10.85			1.99			3.54			2.66
Upper CI	0.9	47.25	30.4116	33.1297	25.9478	2.27156	2.39971	21.8688	76.35	74.0125	-1.08874	166.1	110.466	104.375	-0.65293	93.5	86.95	-2.9081	74.75	73.125	24.6305	129.857	122.143	-1.5729	84.5	78.75	2.94034	10.2312	7.735	-12.7779	502.812	577.25	32.4334	43.2875	43.2375	10.3514	78.5	73.75	1.85567	75.825	74.0125	-0.439513	41.7375	40.4875	0.306717	73073.2	71074.5	-0.175646	32170.1
Lower CI		47.25	30.4116	33.1297	-3.31223	2.27156	2.39971	-6.35116	76.35	74.0125	-5.20874	166.1	110.466	104.375	-9.79293	93.5	86.95	-10.3681	74.75	73.125	-22.4895	129.857	122.143	-9.9929	84.5	78.75	-15.1797	10.2312	7.735	-34.1379	502.812	577.25	4.63339	43.2875	43.2375	-8.58864	78.5	73.75	-19.8443	75.825	74.0125	-4.41951	41.7375	40.4875	-6.77328	73073.2	71074.5	-5.49565	32170.1
					20.1189			12.8097			-6.08496				-11.2613			-3.10509			-3.7037			0.757576			7.59494			-34.626			25.7862			-9.33661			-25.3521			-5.65167			-9.43878			-5.8094
					17.3827			12.0001			-4.58554				-3.93751			-5.47945			-23.4568			-12.766			-3.75			-8.17963			8.57143			-7.04225			-28.2051			-3.22004			-6.76471			-3.1507
					-19.6424			-20.5845			-1.17233				-4.88889			-5.05155			60.6557			-1.65289			-20.2381			-14.4			3.66667			2.63158			3.75			0.237812			2.48756			0.238894
					-1.28648			-4.35385			-3.10734				2.87081			0			13.9241			-7.62712			-1.40845			-15.6404			8.57143			2.34742			1.05263			-1.43678			2.20049			-1.63044
					38.1991			33.0225			-3.74574				-7.8125			-9.82143			-29.5238			-8.84354			-10.101			-30.1935			16.242			-1.33843			-1			-3.74574			-1.3834			-3.85354
					14.4481			13.6076			-0.734394				-14.7541			-13.6364			-1.75439						-14.8515			-36.4615			38.7179			-3.59168			-1.03093			-0.734394			-3.33333			-0.515176
					20.1381			20.6118			0.394218				0			-1.16279			-14.4737			-6.25			-15.2941			-38.6621			45.768			-3.59281			-2.0202			0.394218			-3.49076			0.583378
					1.18411			-5.0426			-6.15385				-2			-11.1111			6.89655			-4.09836			9.09091			-9.5			0.943396			26.9737			-19.1489			-5.2795			-6.14334			-8.54818
[truncated: 96 more columns]

## Sheet: MIT
Name	Group	Age	Predicted VO2 pre (ml/kg/min)	Predicted VO2 post (ml/kg/min)	% change	Predicted VO2peak Pre L/min	Predicted VO2peak Post L/min	% change	Pre Weight (kg)	Post Weight (kg)	% change	Height (cm)	Pre Hip (cm)	Post Hip (cm)	% change	Pre Waist (cm)	Post Waist (cm)	% change	Pre Resting HR (BPM)	Post resting HR (BPM)	% change	Pre Resting SBP (mmHg)	Post resting SBP	% change	Pre Resting DBP (mmHg)	Post Resting DBP (mmHg)	% change	Pre STS (5) (sec)	Post STS (5) (sec)	% change	Pre 6 min walk (m)	Post 6 min walk (m)	% change	Pre Tissue (%fat)	Post Tissue (%fat)	% change	Pre Centile	Post Centile	% change	Pre Total mass (kg)	Post Total mass (kg)	% change	Pre Region (%fat)	Post Region (%fat)	% change	Pre Tissue (g)	Post Tissue (g)	% change	Pre Fat (g)
KT002	2	64	32.393	34.3886	6.16059	2.3161	2.43815	5.26973	71.5	70.9	-0.839161	160	101.5	101	-0.492611	89	84	-5.61798	70	68	-2.85714	123	116	-5.69106	80	79	-1.25	4.94	4.5	-8.90688	630	690	9.52381	38.5	38.1	-1.03896	55	53	-3.63636	71.1	70.9	-0.281294	37.2	36.8	-1.07527	68585	68442	-0.2085	26400
KT003	2	45	35.3062	34.5592	-2.11578	1.86417	1.85928	-0.261908	52.8	53.8	1.89394	175.3	91	95.5	4.94505	74	74	0	79	75	-5.06329	138	124	-10.1449	95	82	-13.6842	6	6	0	450	394	-12.4444	31.8	26.3	-17.2956	16	18	12.5	52.3	53.2	1.72084	24.8	25.8	4.03226	50448	51381	1.84943	12956
KT005	2	57	38.6994	37.6124	-2.80883	2.03559	1.95961	-3.7327	52.6	52.1	-0.95057	144	92.5	84	-9.18919	78	77	-1.28205	54	61	12.963	114	130	14.0351	68	79	16.1765	10.75	9.34	-13.1163	485	488	0.618557	42.4	40.1	-5.42453	77	68	-11.6883	52.8	52.1	-1.32576	41	38.9	-5.12195	51089	50463	-1.22531	21655
KT007	2	40	29.3624	31.1402	6.05468	2.23448	2.36043	5.6366	76.1	75.8	-0.394218	153	115	116	0.869565	114	104	-8.77193	85	80	-5.88235	133	129	-3.00752	88	83	-5.68182	13.5	12	-11.1111	480	510	6.25	54.1	54.2	0.184843	100	100	0	74.6	75.8	1.60858	52.3	52.4	0.191205	72068	73268	1.66509	39016
KT013	2	63	30.2078	31.9302	5.70184	2.07528	2.1968	5.8557	68.7	68.8	0.14556	161.5	106	102	-3.77358	83	82	-1.20482	80	74	-7.5	139	126	-9.35252	80	82	2.5	8	8.5	6.25	577	600	3.98614	39.8	42.8	7.53769	62	75	20.9677	68.7	68.8	0.14556	38.4	41.3	7.55208	66254	66374	0.181121	26376
KT014	2	67	29.2694	35.307	20.6277	2.08105	2.47149	18.7614	71.1	70	-1.54712	163	101	100	-0.990099	93	92	-1.07527	82	58	-29.2683	122	116	-4.91803	79	81	2.53165	9.48	7.21	-23.9451	615	660	7.31707	44.3	45.2	2.0316	79	82	3.79747	69.7	70	0.430416	42.7	43.6	2.10773	67263	67477	0.318154	29800
KT016	2	69	32.403	29.4871	-8.99886	1.91178	1.75153	-8.3819	59	59.4	0.677966	150	121	106.5	-11.9835	99	95.5	-3.53535	65	79	21.5385	129	138	6.97674	63	89	41.2698	8.81	9	2.15664	480	472.5	-1.5625	47	43.4	-7.65957	87	76	-12.6437	60.9	59.4	-2.46305	45.4	42.1	-7.26872	58948	57597	-2.29185	27677
KT017	2	42	28.7054	30.4656	6.13195	2.04095	2.16001	5.8334	71.1	70.9	-0.281294	168	109.5	108	-1.36986	92.5	93	0.540541	90	79	-12.2222	122	133	9.01639	75	91	21.3333	13.1	12.78	-2.44275	450	430	-4.44444	39	40.6	4.10256	78	83	6.41026	71.1	70.9	-0.281294	37.4	38.9	4.0107	68235	67967	-0.39276	26613
Ave	2	55.875	32.0433	33.1113	3.84416	2.06992	2.14966	3.62254	65.3625	65.2125	-0.161862	159.35	104.688	101.625	-2.74802	90.3125	87.6875	-2.61836	75.625	71.75	-3.53648	127.5	126.5	-0.385729	78.5	83.25	7.89941	9.3225	8.66625	-6.38944	520.875	530.562	1.15552	42.1125	41.3375	-2.19525	69.25	69.375	1.96339	65.15	65.1375	-0.0557504	39.9	39.975	0.553503	62861.2	62871.1	-0.0130782	26311.6
SD		11.8133	3.47633	2.78321	8.8265	0.149856	0.27058	8.09873	9.18943	8.85235	1.07532	10.078	10.399	9.42925	5.12568	12.6574	10.1522	3.17815	11.8193	8.51469	15.4113	8.76682	7.74597	9.11649	10.212	4.43203	17.544	3.07154	2.80858	9.79269	74.2514	107.812	7.23043	6.62127	7.79596	7.81544	25.5888	24.692	11.528	8.69417	8.96468	1.39964	7.89991	7.43654	4.95165	8326.18	8555.56	1.37723	7325.04
					7.38			6.77			0.9				4.28			2.66			12.88			7.62			14.66			8.18			6.04			6.54			9.64			1.17			4.14			1.15
Upper CI	0.9	55.875	32.0433	33.1113	11.2242	2.06992	2.14966	10.3925	65.3625	65.2125	0.738138	159.35	104.688	101.625	1.53198	90.3125	87.6875	0.0416425	75.625	71.75	9.34352	127.5	126.5	7.23427	78.5	83.25	22.5594	9.3225	8.66625	1.79056	520.875	530.562	7.19552	42.1125	41.3375	4.34475	69.25	69.375	11.6034	65.15	65.1375	1.11425	39.9	39.975	4.6935	62861.2	62871.1	1.13692	26311.6
Lower CI		55.875	32.0433	33.1113	-3.53584	2.06992	2.14966	-3.14746	65.3625	65.2125	-1.06186	159.35	104.688	101.625	-7.02802	90.3125	87.6875	-5.27836	75.625	71.75	-16.4165	127.5	126.5	-8.00573	78.5	83.25	-6.76059	9.3225	8.66625	-14.5694	520.875	530.562	-4.88448	42.1125	41.3375	-8.73525	69.25	69.375	-7.67661	65.15	65.1375	-1.22575	39.9	39.975	-3.5865	62861.2	62871.1	-1.16308	26311.6
					6.16059			5.26973			-0.839161				-0.492611			-5.61798			-2.85714			-5.69106			-1.25			-8.90688			9.52381			-1.03896			-3.63636			-0.281294			-1.07527			-0.2085
					-2.11578			-0.261908			1.89394				4.94505			0			-5.06329			-10.1449			-13.6842			0			-12.4444			-17.2956			12.5			1.72084			4.03226			1.84943
					-2.80883			-3.7327			-0.95057				-9.18919			-1.28205			12.963			14.0351			16.1765			-13.1163			0.618557			-5.42453			-11.6883			-1.32576			-5.12195			-1.22531
					6.05468			5.6366			-0.394218				0.869565			-8.77193			-5.88235			-3.00752			-5.68182			-11.1111			6.25			0.184843			0			1.60858			0.191205			1.66509
					5.70184			5.8557			0.14556				-3.77358			-1.20482			-7.5			-9.35252			2.5			6.25			3.98614			7.53769			20.9677			0.14556			7.55208			0.181121
					20.6277			18.7614			-1.54712				-0.990099			-1.07527			-29.2683			-4.91803			2.53165			-23.9451			7.31707			2.0316			3.79747			0.430416			2.10773			0.318154
					-8.99886			-8.3819			0.677966				-11.9835			-3.53535			21.5385			6.97674			41.2698			2.15664			-1.5625			-7.65957			-12.6437			-2.46305			-7.26872			-2.29185
					6.13195			5.8334			-0.281294				-1.36986			0.540541			-12.2222			9.01639			21.3333			-2.44275			-4.44444			4.10256			6.41026			-0.281294			4.0107			-0.39276
[truncated: 96 more columns]

## Sheet: SPSS Mixed
Name	Group	Pre/post	Pre/post code	Age	Weight (kg)	Height (cm)	Hip (cm)	Pre Waist (cm)	Pre Resting HR (BPM)	Pre Resting SBP (mmHg)	Pre Resting DBP (mmHg)	Pre STS (5) (sec)	Pre 6 min walk (m)	Pre Tissue (%fat)	Pre Centile	Pre Total mass (kg)	Pre Region (%fat)	Pre Tissue (g)	Pre Fat (g)	Pre Lean (g)	Pre BMC (g)	Pre Fat free (g)	Pre Fasting glucose (mmol/L)	Pre CRP (mg/L)	Pre Fasting Insulin (mU/L)	Pre Heamoglobin (g/L)	Pre Haematocrit	Pre Red cell count (x10^12/L)	Pre Mean cell volume (fL)	Pre Mean cell heamoglobin (pg)	Pre Mean cell heamoglobin conc (g/L)	Pre White cell count (x10^9/L)	Pre Neutrophils (x10^9/L)	Pre Lymphocytes (x10^9/L)	Pre Monocytes (x10^9/L)	Pre Eosinophils (x10^9/L)	Pre Basophils (x10^9/L)	Pre Platelets (x10^9/L)	Baseline PWV (m/s)	Pre Mean aterial pressure (mmHg)	Pre Central systolic pressure (mmHg)	Pre Central Pulse Pressure (mmHg)	Pre Central Augmented Pressure (mmHg)	Pre Central Augmentation Index (mmHg)	Pre Central DP	FACTG pre - PWB	FACTG pre - SWB	FACTG pre - EWB	FACTG pre- FWB
KT006	1	pre	1	56	87.1	173.2	111	95	81	132	79	14.44	397.5	40.7	71	86.7	39.2	83451	33934	49517	3226	52743	5.1	2	9	136	0.41	4.7	88	28.9	329	7.3	4.5	2.1	0.4	0.3	0	272	6.7	102	126	42	15	36	84	26	26	12	24
KT009	1	pre	1	66	56.7	167	94.73	73	81	141	80	12.47	525	35.5	39	55.9	34	53512	19021	34491	2392	36883	4.6	1	6.9	139	0.41	4.5	92	30.8	337	4.8	2.7	1.8	0.3	0.1	0	213	3.6	107	140	54	7	13	86	26	14	14	16
KT010	1	pre	1	51	85.3	168	112.5	97	61	121	84	11.25	600	41.8	80	84.1	40.2	80789	33764	47025	3268	50294	5.2	1	8	131	0.39	4.3	92	30.6	333	4.2	2	1.9	0.2	0.1	0	196	6.3	94	112	28	6	22	84	22	24	9	14
KT012	1	pre	1	29	70.8	164	104.5	85	79	118	71	8.12	525	42.6	95	69.6	40.9	66853	28458	38395	2767	41162	4.7	3	15.4	129	0.39	4.8	82	27	329	7.8	4.1	3	0.4	0.3	0	356	5.1	94	112	28	-1	-2	84	27	22	21	22
KT015	1	pre	1	36	88.1	164	128	112	105	147	99	7.75	471	52.3	100	88.1	50.6	85350	44614	40736	2765	43500	5	3	7.7	140	0.43	4.9	86	28.4	329	6.2	3.8	1.8	0.4	0.1	0	268	6.8	117	137	36	12	33	101	10	21	20	13
KT018	1	pre	1	62	81.7	164.5	122	110	57	195	101	13	390	52.9	97	81.7	51	78808	41671	37138	2890	40028	4.8	7	9.4	129	0.41	4.4	92	29.3	319	6.4	3.9	1.3	0.6	0.4	0.1	233	10.2	131	182	78	26	34	104	26	21	14	17
KT020	1	pre	1	42	76.1	167.5	111	86	76	128	85	8.82	319	50.1	99	76.1	48.7	73880	37040	36840	2207	39047	4.7	4	8.4	138	0.41	4.4	95	31.7	334	14.2	9.6	3.1	0.9	0.5	0.1	404	5.8	83	110	44	17	39	66	26	28	16	28
KT024	1	pre	1	36	65	160.6	100	90	58	122	77	6	795	30.4	47	64.4	29.3	61943	18859	43083	2435	45518	4.7	1	8.1	125	0.38	4.4	86	28.3	327	7.5	4.8	2.1	0.4	0.1	0	242	4.8	90	108	29	1	11	90	18	16	17	11
KT002	2	pre	1	64	71.5	160	101.5	89	70	123	80	4.94	630	38.5	55	71.1	37.2	68585	26400	42185	2466	44651	5.4	1	12.3	152	0.45	4.9	91	31	339	6	2.8	2.8	0.3	0.1	0	243	6.7	95	112	27	7	22	78	21	13	21	27
KT003	2	pre	1	45	52.8	175.3	91	74	79	138	95	6	450	31.8	16	52.3	24.8	50448	12956	37492	1848	39340	4.5	1	4.3	138	0.42	4.3	100	32.4	325	2.6	1.3	1	0.2	0.1	0	202	7.5	105	123	28	0	-1	95	21	16	15	14
KT005	2	pre	1	57	52.6	144	92.5	78	54	114	68	10.75	485	42.4	77	52.8	41	51089	21655	29434	1755	31188	5.1	1	6.9	149	0.44	4.9	91	30.6	336	3.4	2.2	0.8	0.3	0.1	0	236	5.2	93	117	36	9	26	81	22	24	23	20
KT007	2	pre	1	40	76.1	153	115	114	85	133	88	13.5	480	54.1	100	74.6	52.3	72068	39016	33052	2537	35589	5.3	21	19.2	133	0.39	4.4	89	30.2	339	6.9	4.3	2.2	0.3	0.2	0	214	7.1	114	136	41	14	35	95	20	26	17	20
KT013	2	pre	1	63	68.7	161.5	106	83	80	139	80	8	577	39.8	62	68.7	38.4	66254	26376	39878	2421	42299	4.4	3	3	139	0.42	4.7	89	29.6	334	7.5	4.2	2.6	0.5	0.3	0.1	273	2.5	98	122	40	9	21	82	27	26	19	25
KT014	2	pre	1	67	71.1	163	101	93	82	122	79	9.48	615	44.3	79	69.7	42.7	67263	29800	37463	2453	39916	4.9	2	7.1	144	0.44	4.7	93	30.6	330	5.4	2.9	1.9	0.3	0.2	0	296	7.4	101	121	31	10	33	90	24	13	16	22
KT016	2	pre	1	69	59	150	121	99	65	129	63	8.81	480	47	87	60.9	45.4	58948	27677	31271	1952	33223	5.8	1	9	147	0.45	4.9	92	30.1	327	6.3	3.3	2.4	0.5	0.1	0	196	8.1	118	149	51	16	32	98	22	23	10	20
KT017	2	pre	1	42	71.1	168	109.5	92.5	90	122	75	13.1	450	39	78	71.1	37.4	68235	26613	41622	2866	44488	4.5	12	8.3	120	0.36	3.9	91	30.6	337	2.6	1.4	1	0.1	0	0	197	7.6	88	107	31	3	9	76	16	26	22	19
KT006	1	Post	2	56	81.8	173.2	98.5	88.5	78	133	85	9.44	500	36.9	53	81.8	35.5	78603	29024	49579	3173	52752	4.3	1	7	136	0.42	4.6	91	29.3	322	7.6	4.3	2.2	0.5	0.5	0	282	8.5	99	119	33	3	9	86	26	22	18	26
KT009	1	Post	2	66	54.1	167	91	69	62	123	77	11.45	570	33	28	54.1	31.7	51826	17121	34705	2246	62951	4.5	2	5	150	0.45	4.8	93	31.3	337	5.3	2.2	2.6	0.4	0.1	0	214	6	90	114	36	10	27	78	25	18	23	23
KT010	1	Post	2	51	84.3	168	107	92.1	98	119	67	9.63	622	42.9	83	84.3	41.2	80982	34726	46256	3272	49528	4.8	1	6.2	136	0.41	4.4	93	30.8	332	4.7	2	2.2	0.4	0.1	0	196	5.9	84	99	29	-2	-8	70	25	27	18	22
KT012	1	Post	2	29	68.6	164	107.5	85	90	109	70	6.85	570	43.6	96	68.6	41.8	65763	28652	37111	2793	39904	4.6	3	15	134	0.4	4.9	82	27.3	332	6.7	3.1	2.8	0.5	0.3	0.1	316	4.4	85	96	26	4	14	70	23	25	20	24
KT015	1	Post	2	36	84.8	164	118	101	74	134	89	5.41	547.5	51.6	99	84.8	49.9	82061	42338	39723	2781	42504	5	1	13.5	143	0.43	4.9	88	29	329	6.2	3.7	2	0.4	0.1	0	247	8	103	119	30	10	33	89	23	20	21	23
KT018	1	Post	2	62	81.1	164.5	104	95	56	142	86	8.26	541	51	96	81.1	49.3	78402	39994	39408	2684	41092	4.8	14	7.1	130	0.4	4.5	89	28.7	322	7.6	4.8	1.6	0.8	0.3	0.1	314	7.2	102	133	47	15	32	86	24	23	15	19
KT020	1	Post	2	42	76.4	167.5	111	85	65	120	72	5.41	465	48.3	97	76.4	47	74311	35920	38392	2124	40516	5.7	3	7.6	139	0.42	4.5	94	31.2	332	14.4	7.9	4.7	1.1	0.5	0.1	350	6	83	102	32	9	27	70	27	26	22	27
KT024	1	Post	2	36	61	160.6	98	80	62	117	84	5.43	802.5	38.6	38	61	27.5	56648	16799	41849	2374	44223	4.1	1	5	128	0.39	4.5	85	28.1	325	8.2	4.6	2.4	0.6	0.1	0	230	5.7	94	107	23	1	5	84	25	21	18	17
KT002	2	Post	2	64	70.9	160	101	84	68	116	79	4.5	690	38.1	53	70.9	36.8	68442	26058	42384	2431	44815	5.2	1	6.4	150	0.44	4.8	92	31.5	344	5.7	2.3	2.9	0.4	0.1	0.1	270	4.4	91	108	27	6	22	81	21	20	21	24
KT003	2	Post	2	45	53.8	175.3	95.5	74	75	124	82	6	394	26.3	18	53.2	25.8	51381	13493	37889	1834	39723	4.3	1	3.8	126	0.39	3.9	99	32..1	323	2.8	1.2	1.2	0.3	0.2	0	237	6.8	101	109	25	-3	-11	84	24	18	16	18
KT005	2	Post	2	57	52.1	144	84	77	61	130	79	9.34	488	40.1	68	52.1	38.9	50463	20256	30206	1663	31869	5.2	1	9.3	129	0.39	4.3	92	30.4	332	3.7	2.2	0.8	0.5	0.1	0	262	6	92	117	37	7	20	80	25	22	23	26
KT007	2	Post	2	40	75.8	153	116	104	80	129	83	12	510	54.2	100	75.8	52.4	73268	39709	33559	2489	36047	6.1	16	18.1	135	0.41	4.5	92	30.3	330	7	4.3	2	0.4	0.2	0.1	220	6.4	101	119	36	11	31	83	20	25	14	23
KT013	2	Post	2	63	68.8	161.5	102	82	74	126	82	8.5	600	42.8	75	68.8	41.3	66374	28423	37951	2445	40396	4.7	5	3.6	136	0.41	4.6	90	29.8	333	7.2	3.4	3	0.6	0.3	0.1	258	6	96	116	32	9	27	84	26	23	19	28
KT014	2	Post	2	67	70	163	100	92	58	116	81	7.21	660	45.2	82	70	43.6	67477	30506	36971	2508	39479	4.7	3	9.6	140	0.44	4.7	92	29.7	321	5.4	2.3	0.6	0.2	0	0	293	5.3	98	112	29	-1	-3	83	26	12	17	23
KT016	2	Post	2	69	59.4	150	106.5	95.5	79	138	89	9	472.5	43.4	76	59.4	42.1	57597	25026	32571	1852	34423	5.5	1	11	151	0.46	4.9	93	30.8	330	6.2	3.5	2	0.5	0.2	0.1	197	8.1	103	124	35	11	31	89	25	24	16	21
KT017	2	Post	2	42	70.9	168	108	93	79	133	91	12.78	430	40.6	83	70.9	38.9	67967	27570	40398	2907	43305	3.7	18	4.5	126	0.39	4.3	90	29.2	324	4.1	2.5	1.1	0.3	0.2	0	254	6.9	111	135	42	8	19	93	23	26	16	22
					70.2344	162.725										70.0312
[truncated: 1 more columns]

## Sheet: HIT1
Name	KT006	KT009	KT010	KT012	KT015	KT018	KT020	KT024
Group	1	1	1	1	1	1	1	1
Age	56	66	51	29	36	62	42	36
Pre Weight (kg)	87.1	56.7	85.3	70.8	88.1	81.7	76.1	65
Post Weight (kg)	81.8	54.1	84.3	68.6	84.8	81.1	76.4	61	74.0125
Height (cm)	173.2	167	168	164	164	164.5	167.5	160.6
Pre Hip (cm)	111	94.73	112.5	104.5	128	122	111	100
Post Hip (cm)	98.5	91	107	107.5	118	104	111	98
Pre Waist (cm)	95	73	97	85	112	110	86	90
Post Waist (cm)	88.5	69	92.1	85	101	95	85	80
Pre Resting HR (BPM)	81	81	61	79	105	57	76	58
Post resting HR (BPM)	78	62	98	90	74	56	65	62
Pre Resting SBP (mmHg)	132	141	121	118	147		128	122
Post resting SBP	133	123	119	109	134		120	117
Pre Resting DBP (mmHg)	79	80	84	71	99	101	85	77
Post Resting DBP (mmHg)	85	77	67	70	89	86	72	84
Pre STS (5) (sec)	14.44	12.47	11.25	8.12	7.75	13	8.82	6
Post STS (5) (sec)	9.44	11.45	9.63	6.85	5.41	8.26	5.41	5.43
Pre 6 min walk (m)	397.5	525	600	525	471	390	319	795
Post 6 min walk (m)	500	570	622	570	547.5	541	465	802.5
Pre Tissue (%fat)	40.7	35.5	41.8	42.6	52.3	52.9	50.1	30.4
Post Tissue (%fat)	36.9	33	42.9	43.6	51.6	51	48.3	38.6
Pre Centile	71	39	80	95	100	97	99	47
Post Centile	53	28	83	96	99	96	97	38
Pre Total mass (kg)	86.7	55.9	84.1	69.6	88.1	81.7	76.1	64.4
Post Total mass (kg)	81.8	54.1	84.3	68.6	84.8	81.1	76.4	61
Pre Region (%fat)	39.2	34	40.2	40.9	50.6	51	48.7	29.3
Post Region (%fat)	35.5	31.7	41.2	41.8	49.9	49.3	47	27.5
Pre Tissue (g)	83451	53512	80789	66853	85350	78808	73880	61943
Post Tissue (g)	78603	51826	80982	65763	82061	78402	74311	56648
Pre Fat (g)	33934	19021	33764	28458	44614	41671	37040	18859
Post Fat (g)	29024	17121	34726	28652	42338	39994	35920	16799
Pre Lean (g)	49517	34491	47025	38395	40736	37138	36840	43083
Post Lean (g)	49579	34705	46256	37111	39723	39408	38392	41849
Pre BMC (g)	3226	2392	3268	2767	2765	2890	2207	2435
Post BMC (g)	3173	2246	3272	2793	2781	2684	2124	2374
Pre Fat free (g)	52743	36883	50294	41162	43500	40028	39047	45518
Post Fat free (g)	52752	62951	49528	39904	42504	41092	40516	44223
Pre Fasting glucose (mmol/L)	5.1	4.6	5.2	4.7	5	4.8	4.7	4.7
Post Fasting glucose (mmol/L)	4.3	4.5	4.8	4.6	5	4.8	5.7	4.1
Pre CRP (mg/L)	2	1	1	3	3		4	1
Post CRP (mg/L)	1	2	1	3	1		3	1
Pre Fasting Insulin (mU/L)	9	6.9	8			9.4	8.4	8.1
Post Fasting Insulin (mU/L)	7	5	6.2			7.1	7.6	5
Pre Heamoglobin (g/L)	136	139	131	129	140	129	138	125
Post Heamoglobin (g/L)	136	150	136	134	143	130	139	128
Pre Haematocrit	0.41	0.41	0.39	0.39	0.43	0.41	0.41	0.38
Post Haematocrit	0.42	0.45	0.41	0.4	0.43	0.4	0.42	0.39
Pre Red cell count (x10^12/L)	4.7	4.5	4.3	4.8	4.9	4.4	4.4	4.4
Post Red cell count (x10^12/L)	4.6	4.8	4.4	4.9	4.9	4.5	4.5	4.5
Pre Mean cell volume (fL)	88	92	92	82	86	92	95	86
Post Mean cell volume (fL)	91	93	93	82	88	89	94	85
Pre Mean cell heamoglobin (pg)	28.9	30.8	30.6	27	28.4	29.3	31.7	28.3
Post Mean cell heamoglobin (pg)	29.3	31.3	30.8	27.3	29	28.7	31.2	28.1
Pre Mean cell heamoglobin conc (g/L)	329	337	333	329	329	319	334	327
Post Mean cell heamoglobin conc (g/L)	322	337	332	332	329	322	332	325
Pre White cell count (x10^9/L)	7.3	4.8	4.2	7.8	6.2	6.4	14.2	7.5
Post White cell count (x10^9/L)	7.6	5.3	4.7	6.7	6.2	7.6	14.4	8.2
Pre Neutrophils (x10^9/L)	4.5	2.7	2	4.1	3.8	3.9	9.6	4.8
Post Neutrophils (x10^9/L)	4.3	2.2	2	3.1	3.7	4.8	7.9	4.6
Pre Lymphocytes (x10^9/L)	2.1	1.8	1.9	3	1.8	1.3	3.1	2.1
Post Lymphocytes (x10^9/L)	2.2	2.6	2.2	2.8	2	1.6	4.7	2.4
Pre Monocytes (x10^9/L)	0.4	0.3	0.2	0.4	0.4	0.6	0.9	0.4
Post Monocytes (x10^9/L)	0.5	0.4	0.4	0.5	0.4	0.8	1.1	0.6
Pre Eosinophils (x10^9/L)	0.3	0.1	0.1	0.3	0.1	0.4	0.5	0.1
Post Eosinophils (x10^9/L)	0.5	0.1	0.1	0.3	0.1	0.3	0.5	0.1
Pre Basophils (x10^9/L)	0	0	0	0	0	0.1	0.1	0
Post Basophils (x10^9/L)	0	0	0	0.1	0	0.1	0.1	0
Pre Platelets (x10^9/L)	272	213	196	356	268	233	404	242
Posts Platelets (x10^9/L)	282	214	196	316	247	314	350	230
Baseline PWV (m/s)	6.7	3.6	6.3	5.1	6.8	10.2	5.8	4.8
1 month PWV (m/s)	7	6.8	5.8	5.3	8	8.3	3.8	4.9
2 months PWV (m/s)	7.7	6.8	2.7	5.8	7	8	6.6	4.8
Post PWV (m/s)	8.5	6	5.9	4.4	8	7.2	6	5.7
Pre Mean aterial pressure (mmHg)	102	107	94	94	117	131	83	90
1 month Mean aterial pressure (mmHg)	101	80	88	94	105	110	98	86
2 month Mean aterial pressure (mmHg)	86	87	92	90	109	119	90	84
Post Mean aterial pressure (mmHg)	99	90	84	85	103	102	83	94
Pre Central systolic pressure (mmHg)	126	140	112	112	137	182	110	108
1 month Central systolic pressure (mmHg)	124	97	102	109	127	145	116	106
2 month Central systolic pressure (mmHg)	106	106	108	99	124	150	112	77
Post Central systolic pressure (mmHg)	119	114	99	96	119	133	102	107
Pre Central Pulse Pressure (mmHg)	42	54	28	28	36	78	44	29
1 month Central Pulse Pressure (mmHg)	38	26	23	32	38	53	30	29
2 month Central Pulse Pressure (mmHg)	33	30	25	25	33	53	34	30
Post Central Pulse Pressure (mmHg)	33	36	29	26	30	47	32	23
Pre Central Augmented Pressure (mmHg)	15	7	6	-1	12	26	17	1
1 month Central Augmented Pressure (mmHg)	11	-1	1	8	13	21	5	1
2 month Central Augmented Pressure (mmHg)	5	6	4	-3	8	21	6	1
Post Central Augmented Pressure (mmHg)	3	10	-2	4	10	15	9	1
Pre Central Augmentation Index (mmHg)	36	13	22	-2	33	34	39	11
1 month Central Augmentation Index (mmHg)	29	-3	6	25	34	38	15	10
2 month Central Augmentation Index (mmHg)	14	21	17	-13	27	39	18	8
Post Central Augmentation Index (mmHg)	9	27	-8	14	33	32	27	5
Pre Central DP	84	86	84	84	101	104	66	90
1 month Central DP	86	71	79	77	88	92	86	86
2 month Central DP	73	76	86	74	90	98	78	85
Post Central DP	86	78	70	70	89	86	70	84
FACTG pre - PWB	26	26	22	27	10	26	26	18
FACTG post - PWB	26	25	25	23	23	24	27	25
FACTG pre - SWB	26	14	24	22	21	21	28	16
FACTG post - SWB	22	18	27	25	20	23	26	21
FACTG pre - EWB	12	14	9	21	20	14	16	17
FACTG post - EWB	18	23	18	20	21	15	22	18
FACTG pre- FWB	24	16	14	22	13	17	28	11
FACTG post- FWB	26	23	22	24	23	19	27	17
FACTG - pre - TOTAL (0-108)	88	70	69	92	64	78	98	62
FACTG - post - TOTAL (0-108)	92	89	92	92	87	81	102	81

## Sheet: MIT1
Name	KT002	KT003	KT005	KT007	KT013	KT014	KT016	KT017
Group	2	2	2	2	2	2	2	2
Age	64	45	57	40	63	67	69	42
Pre Weight (kg)	71.5	52.8	52.6	76.1	68.7	71.1	59	71.1
Post Weight (kg)	70.9	53.8	52.1	75.8	68.8	70	59.4	70.9	65.2125
Height (cm)	160	175.3	144	153	161.5	163	150	168
Pre Hip (cm)	101.5	91	92.5	115	106	101	121	109.5
Post Hip (cm)	101	95.5	84	116	102	100	106.5	108
Pre Waist (cm)	89	74	78	114	83	93	99	92.5
Post Waist (cm)	84	74	77	104	82	92	95.5	93	8.48561
Pre Resting HR (BPM)	70	79	54	85	80	82	65	90
Post resting HR (BPM)	68	75	61	80	74	58	79	79
Pre Resting SBP (mmHg)	123	138	114	133	139	122	129	122
Post resting SBP	116	124	130	129	126	116	138	133
Pre Resting DBP (mmHg)	80	95	68	88	80	79	63	75
Post Resting DBP (mmHg)	79	82	79	83	82	81	89	91
Pre STS (5) (sec)	4.94	6	10.75	13.5	8	9.48	8.81	13.1
Post STS (5) (sec)	4.5	6	9.34	12	8.5	7.21	9	12.78
Pre 6 min walk (m)	630	450	485	480	577	615	480	450
Post 6 min walk (m)	690	394	488	510	600	660	472.5	430
Pre Tissue (%fat)	38.5	31.8	42.4	54.1	39.8	44.3	47	39
Post Tissue (%fat)	38.1	26.3	40.1	54.2	42.8	45.2	43.4	40.6
Pre Centile	55	16	77	100	62	79	87	78
Post Centile	53	18	68	100	75	82	76	83
Pre Total mass (kg)	71.1	52.3	52.8	74.6	68.7	69.7	60.9	71.1
Post Total mass (kg)	70.9	53.2	52.1	75.8	68.8	70	59.4	70.9
Pre Region (%fat)	37.2	24.8	41	52.3	38.4	42.7	45.4	37.4
Post Region (%fat)	36.8	25.8	38.9	52.4	41.3	43.6	42.1	38.9
Pre Tissue (g)	68585	50448	51089	72068	66254	67263	58948	68235
Post Tissue (g)	68442	51381	50463	73268	66374	67477	57597	67967
Pre Fat (g)	26400	12956	21655	39016	26376	29800	27677	26613
Post Fat (g)	26058	13493	20256	39709	28423	30506	25026	27570
Pre Lean (g)	42185	37492	29434	33052	39878	37463	31271	41622
Post Lean (g)	42384	37889	30206	33559	37951	36971	32571	40398
Pre BMC (g)	2466	1848	1755	2537	2421	2453	1952	2866
Post BMC (g)	2431	1834	1663	2489	2445	2508	1852	2907
Pre Fat free (g)	44651	39340	31188	35589	42299	39916	33223	44488
Post Fat free (g)	44815	39723	31869	36047	40396	39479	34423	43305
Pre Fasting glucose (mmol/L)	5.4	4.5	5.1	5.3	4.4	4.9	5.8	4.5
Post Fasting glucose (mmol/L)	5.2	4.3	5.2	6.1	4.7	4.7	5.5	3.7
Pre CRP (mg/L)	1	1	1		3	2	1
Post CRP (mg/L)	1	1	1		5	3	1
Pre Fasting Insulin (mU/L)	12.3	4.3	6.9		3	7.1	9	8.3
Post Fasting Insulin (mU/L)	6.4	3.8	9.3		3.6	9.6	11	4.5
Pre Heamoglobin (g/L)	152	138	149	133	139	144	147	120
Post Heamoglobin (g/L)	150	126	129	135	136	140	151	126
Pre Haematocrit	0.45	0.42	0.44	0.39	0.42	0.44	0.45	0.36
Post Haematocrit	0.44	0.39	0.39	0.41	0.41	0.44	0.46	0.39
Pre Red cell count (x10^12/L)	4.9	4.3	4.9	4.4	4.7	4.7	4.9	3.9
Post Red cell count (x10^12/L)	4.8	3.9	4.3	4.5	4.6	4.7	4.9	4.3
Pre Mean cell volume (fL)	91	100	91	89	89	93	92	91
Post Mean cell volume (fL)	92	99	92	92	90	92	93	90
Pre Mean cell heamoglobin (pg)	31	32.4	30.6	30.2	29.6	30.6	30.1	30.6
Post Mean cell heamoglobin (pg)	31.5	32..1	30.4	30.3	29.8	29.7	30.8	29.2
Pre Mean cell heamoglobin conc (g/L)	339	325	336	339	334	330	327	337
Post Mean cell heamoglobin conc (g/L)	344	323	332	330	333	321	330	324
Pre White cell count (x10^9/L)	6	2.6	3.4	6.9	7.5	5.4	6.3	2.6
Post White cell count (x10^9/L)	5.7	2.8	3.7	7	7.2	5.4	6.2	4.1
Pre Neutrophils (x10^9/L)	2.8	1.3	2.2	4.3	4.2	2.9	3.3	1.4
Post Neutrophils (x10^9/L)	2.3	1.2	2.2	4.3	3.4	2.3	3.5	2.5
Pre Lymphocytes (x10^9/L)	2.8	1	0.8	2.2	2.6	1.9	2.4	1
Post Lymphocytes (x10^9/L)	2.9	1.2	0.8	2	3	0.6	2	1.1
Pre Monocytes (x10^9/L)	0.3	0.2	0.3	0.3	0.5	0.3	0.5	0.1
Post Monocytes (x10^9/L)	0.4	0.3	0.5	0.4	0.6	0.2	0.5	0.3
Pre Eosinophils (x10^9/L)	0.1	0.1	0.1	0.2	0.3	0.2	0.1	0
Post Eosinophils (x10^9/L)	0.1	0.2	0.1	0.2	0.3	0	0.2	0.2
Pre Basophils (x10^9/L)	0	0	0	0	0.1	0	0	0
Post Basophils (x10^9/L)	0.1	0	0	0.1	0.1	0	0.1	0
Pre Platelets (x10^9/L)	243	202	236	214	273	296	196	197
Posts Platelets (x10^9/L)	270	237	262	220	258	293	197	254
Baseline PWV (m/s)	6.7	7.5	5.2	7.1	2.5	7.4	8.1	7.6
1 month PWV (m/s)	6.3	7.5	5.6	6.3	5.8	3.3	7.1	7
2 months PWV (m/s)	6.5	10.1	2.1	6.4	6.5	6.5	6.8	7.2
Post PWV (m/s)	4.4	6.8	6	6.4	6	5.3	8.1	6.9
Pre Mean aterial pressure (mmHg)	95	105	93	114	98	101	118	88
1 month Mean aterial pressure (mmHg)	98	101	88	118	89	112	84	90
2 month Mean aterial pressure (mmHg)	85	105	84	89	93	110	89	103
Post Mean aterial pressure (mmHg)	91	101	92	101	96	98	103	111
Pre Central systolic pressure (mmHg)	112	123	117	136	122	121	149	107
1 month Central systolic pressure (mmHg)	119	116	113	145	112	140	117	113
2 month Central systolic pressure (mmHg)	103	130	106	106	111	126	126	121
Post Central systolic pressure (mmHg)	108	109	117	119	116	112	124	135
Pre Central Pulse Pressure (mmHg)	27	28	36	41	40	31	51	31
1 month Central Pulse Pressure (mmHg)	38	24	38	54	36	44	52	35
2 month Central Pulse Pressure (mmHg)	27	40	35	33	28	43	55	29
Post Central Pulse Pressure (mmHg)	27	25	37	36	32	29	35	42
Pre Central Augmented Pressure (mmHg)	7	0	9	14	9	10	16	3
1 month Central Augmented Pressure (mmHg)	12	-7	10	17	10	13	21	6
2 month Central Augmented Pressure (mmHg)	4	2	10	14	7	11	24	4
Post Central Augmented Pressure (mmHg)	6	-3	7	11	9	-1	11	8
Pre Central Augmentation Index (mmHg)	22	-1	26	35	21	33	32	9
1 month Central Augmentation Index (mmHg)	32	-28	27	31	28	30	41	16
2 month Central Augmentation Index (mmHg)	15	2	28	41	26	26	43	15
Post Central Augmentation Index (mmHg)	22	-11	20	31	27	-3	31	19
Pre Central DP	78	95	81	95	82	90	98	76
1 month Central DP	81	92	75	91	76	96	65	78
2 month Central DP	76	90	71	73	83	96	71	92
Post Central DP	81	84	80	83	84	83	89	93
FACTG pre - PWB	21	21	22	20	27	24	22	16
FACTG post - PWB	21	24	25	20	26	26	25	23
FACTG pre - SWB	13	16	24	26	26	13	23	26
FACTG post - SWB	20	18	22	25	23	12	24	26
FACTG pre - EWB	21	15	23	17	19	16	10	22
FACTG post - EWB	21	16	23	14	19	17	16	16
FACTG pre- FWB	27	14	20	20	25	22	20	19
FACTG post- FWB	24	18	26	23	28	23	21	22
FACTG - pre - TOTAL (0-108)	82	66	89	83	97	75	75	83
FACTG - post - TOTAL (0-108)	86	76	96	82	96	78	86	87

## Sheet: HIIT Compliance
Name	Group	Time (weeks)	Total Sessions	Sessions Attended
KT006	1	12	36	35
KT009	1	12	36	36
KT010	1	12	36	33
KT012	1	12	36	34
KT015	1	12	36	34
KT018	1	12	36	36
KT020	1	12	36	33
KT024	1	12	36	30
				33.875

## Sheet: CMIT Compliance
Name	Group	Time (weeks)	Total Sessions	Sessions Attended	sessions missed
KT002	2	12	36	33	13,14,31
KT003	2	12	36	34	2,3,
KT005	2	12	36	31	5,7,9,10,11
KT007	2	12	36	35	31,35
KT013	2	12	36	36	0
KT014	2	12	36	36	0
KT016	2	12	36	30	23,24,25,26,30,33
KT017	2	12	36	34	33,36
				33.625

## Sheet: Overall compliance
Name	Group	Time (weeks)	Total Sessions	Sessions Attended	sessions missed
KT006	1	12	36	35	4
KT009	1	12	36	36	0
KT010	1	12	36	33	3, 18, 21
KT012	1	12	36	34	10,12
KT015	1	12	36	34	9,10
KT018	1	12	36	36	0
KT020	1	12	36	33	14,19,30
KT024	1	12	36	30	9,15,16,17,18,22,
KT002	2	12	36	33	2,32,33,
KT003	2	12	36	34	32,34
KT005	2	12	36	31	15,16,17,21, 31
KT007	2	12	36	35	3
KT013	2	12	36	36	0
KT014	2	12	36	36	0
KT016	2	12	36	30	11,12,13,14,31,33
KT017	2	12	36	34	5,7
			36	33.75
			SD	2.02
				93.75% average session compliance

## Sheet: Weight
	Pre	Post
HIIT M	75.825	74.0125
SD	11.5777	11.5506
Mod M	65.15	65.1375
SD	8.69417	8.96468

## Sheet: STS
	Pre	Post
HIIT M	10.2312	7.735
SD	2.97462	2.31401
Mod M	9.3225	8.66625
SD	3.07154	2.80858

[truncated: 3 more sheets: 6MWT, CMIT HR RPE, LVHIIT HR RPE]
